# Supplementary material for: Synthesis of amide imidazole-based functionalized ionic liquid for separation of Th/Pu
Source: publisher site journal article supplement (doi:10.1515/ract-2024-0336), 2025-04-28
Supplement: Supplementary file 1 [file j_ract-2024-0336_suppl_001.docx]

**Electronic Supporting information**

**Synthesis of amide imidazole-based functionalized ionic liquid for separation of Th/Pu**

Peng Liu, Shan Xing, Xiaomin Li, Meiying Liu, Xupeng Zhi, Xinlong Chen, Keliang Shi*, Yinglin Shen*

School of Nuclear Science and Technology, Lanzhou University, Lanzhou 730000, China

Fig.S1 Mass spectra of ionic liquid DXZ-1

Fig.S2 Mass spectra of ionic liquid DXZ-2

Fig.S3 Mass spectra of ionic liquid MIMDIDOA

**
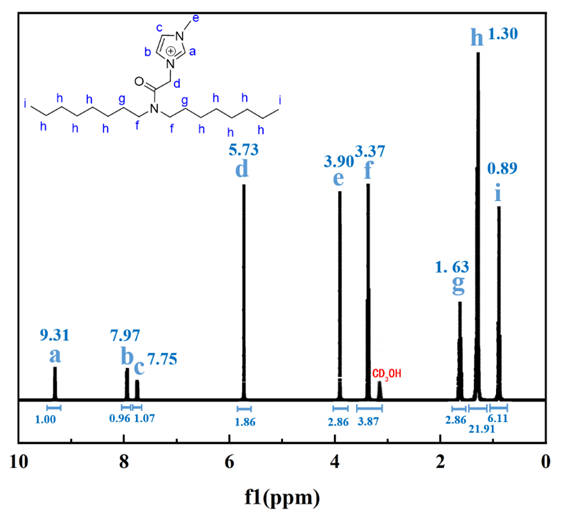
**

Fig. S4 1H-NMR of DXZ-1

**
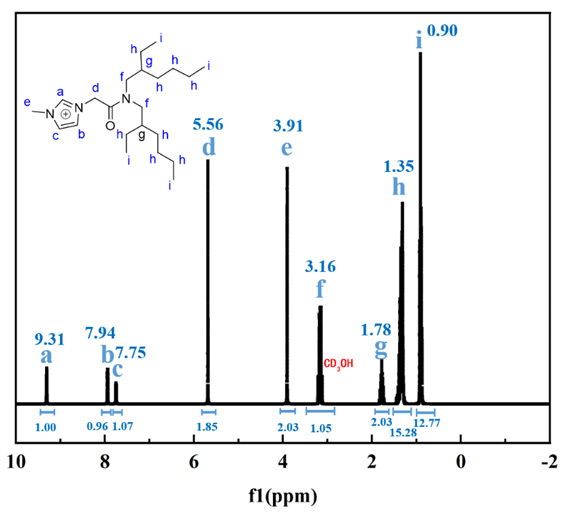
**

Fig. S5 1H-NMR of DXZ-2

**
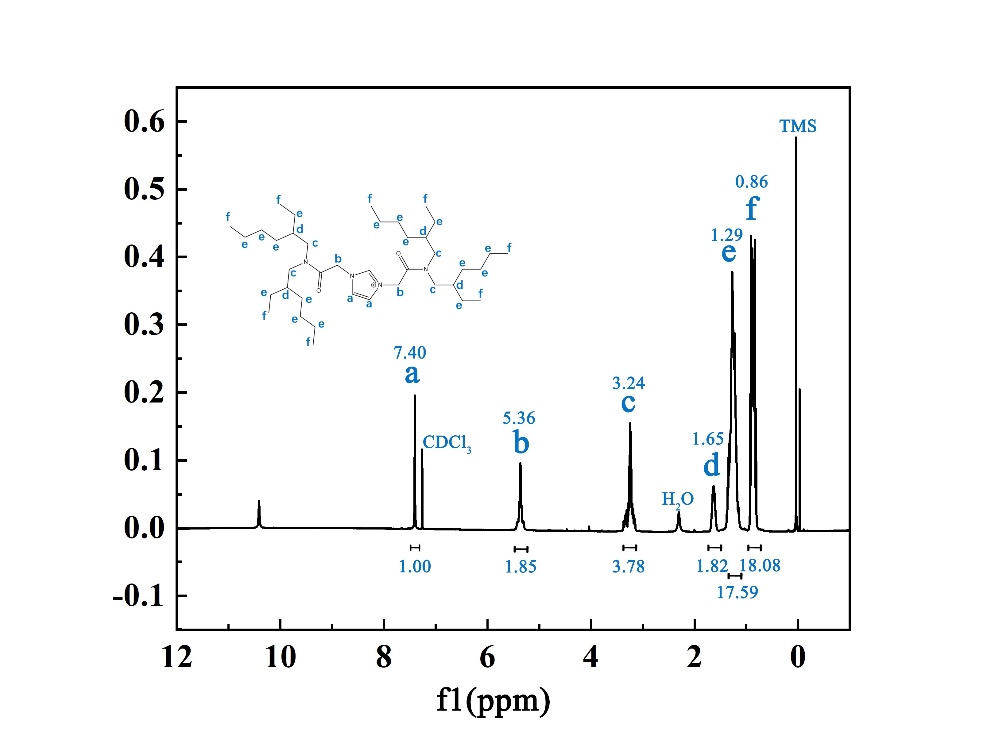
**

Fig. S6 1H-NMR of MIMDIDOA

Table.S1 The mass fractions of Cl and Th in MIMDIDOA and MIMDIDOA@Th4+

|  | MIMDIDOA | MIMDIDOA@Th4+ |
| --- | --- | --- |
| Cl/wt% | 5.15 | 0.12 |
| Th/wt% | 0 | 1.04 |
